## RESEARCH ARTICLE

# Risk factors for low birth weight in hospitals of North Wello zone, Ethiopia: A case-control study

Tesfahun Mulatu Wachamo<sup>1</sup>, Nigus Bililign Yimer<sup>2\*</sup>, Asmamaw Demis Bizuneh<sup>3</sup>

**1** Department of Public Health, Faculty of Health Sciences, Woldia University, Woldia, Ethiopia,

**2** Department of Midwifery, Faculty of Health Sciences, Woldia University, Woldia, Ethiopia, **3** Department of Nursing, Faculty of Health Sciences, Woldia University, Woldia, Ethiopia

\* [bililignigus@gmail.com](mailto:bililignigus@gmail.com)

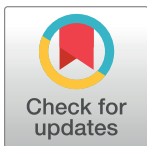

## Abstract

### Background

Low birth weight at birth is an important underlying contributor for neonatal and infant mortality. It accounts for nearly half of all perinatal deaths. Identifying predictors of low birth weight is the first essential step in designing appropriate management strategies. Hence, this study aimed to identify risk factors for low birth weight in hospitals of northeastern Ethiopia.

### Methods

An institution based case-control study design was conducted from 10<sup>th</sup> April to 15<sup>th</sup> December 2016. Three hundred sixty mother-infant pairs (120 low birth weight babies as cases and 240 normal birth weights as controls) were included in the study. Data were collected by face-to-face interview. Univariable and multivariable logistic regression models were computed to examine the effect of independent variables on outcome variable using SPSS 20.0. Variables with p-value <0.05 were considered statistically significant.

### Results

The mean ( $\pm$ SD) gestational age and birth weight ( $\pm$ SD) were 39.2 ( $\pm$ 1.38) weeks and 2800 ( $\pm$ 612), grams respectively. Partner's education/being illiterate (AOR: 4.09; 95% CI 1.45, 11.50), antenatal care visit at private health institutions (AOR: 0.13; 95% CI 0.02, 0.66), having history of obstetric complications (AOR: 5.70; 95% CI 2.38, 13.63), maternal weight during pregnancy (AOR: 4.04; 95% CI 1.50, 10.84) and gravidity (AOR: 0.36; 95% CI 0.18, 0.73) were significantly associated with low birth weight. Additionally, a site for water storage and water treatment were significant environmental factors.

### Conclusion

Maternal weight during pregnancy, paternal education, previous obstetric complication and place of antenatal follow-up were associated with low birth weight. The risk factors identified in this study are preventable. Thus, nutritional counseling, health education on improvement

## OPEN ACCESS

**Citation:** Wachamo TM, Bililign Yimer N, Bizuneh AD (2019) Risk factors for low birth weight in hospitals of North Wello zone, Ethiopia: A case-control study. PLoS ONE 14(3): e0213054. <https://doi.org/10.1371/journal.pone.0213054>

**Editor:** Eduardo Ortiz-Panoso, National Institute of Public Health, MEXICO

**Received:** May 8, 2017

**Accepted:** February 14, 2019

**Published:** March 20, 2019

**Copyright:** © 2019 Wachamo et al. This is an open access article distributed under the terms of the [Creative Commons Attribution License](https://creativecommons.org/licenses/by/4.0/), which permits unrestricted use, distribution, and reproduction in any medium, provided the original author and source are credited.

**Data Availability Statement:** All relevant data are within the paper and its Supporting Information files.

**Funding:** Woldia University sponsored this study. [www.widu.edu.et](http://www.widu.edu.et) The funders had no role in study design, data collection and analysis, decision to publish, or preparation of the manuscript.

**Competing interests:** The authors have declared that no competing interests exist.

of lifestyle and early recognition and treatment of complications are the recommended interventions.

## Introduction

Low birth weight (LBW) is defined as a birth weight less than 2500g and LBW infants are at greater risk of death and disability [1]. Globally, 2.6 million newborns died in 2016. Half of these deaths occurred in India, Pakistan, Nigeria, the Democratic Republic of the Congo and Ethiopia. The most common causes of these deaths were birth asphyxia, infection, complications of preterm birth and birth defects in the early neonatal period [2]. Thirty percent of deaths were attributed to premature birth and low birth weight [3]. According to the recent report of the United Nations Children's Fund (UNICEF), the neonatal mortality rate of Ethiopia was 28 per 1000 live births in 2016 [4].

Globally, an estimated 15% to 20% of all births are LBW [5, 6]. The prevalence of low birth weight in Senegal, Burkina Faso, Malawi, Ghana, and Uganda was, respectively, 15.7%, 13.4%, 12.1%, 10.2%, and 10% [7]. Currently, thirteen percent of Ethiopian babies are low birth weight [8]. Studies in Ethiopia reported 8.8% and 10.5% prevalence of low birth weight in Addis Ababa and Tigray region, respectively [9, 10].

Very low birth weight infants have decreased cognitive, language and motor functions [11]. A systematic review of low birth weight in Africa showed an increased risk of death, growth retardation and delayed neurodevelopment among very low birth weight and extremely low birth weight children [12]. Furthermore, newborns with low birth weight were at higher risk of stillbirth, low Apgar score, admission to neonatal intensive care unit and early neonatal death in Zambia [13]. Additionally, low birth weight was associated with a risk of hypertension later in life [14].

One cohort study showed vomiting during the early trimester of pregnancy was associated with a higher risk of low birth weight [15]. In developing countries, maternal age, illiteracy, antenatal care follow-up, body mass index and socioeconomic status were predictors of low birth weight [16]. Antepartum hemorrhage, hypertensive disorders of pregnancy and primiparity were associated with low birth weight in a Gambian study [17]. Additionally, low birth weight was associated with maternal anemia [18] and malaria during pregnancy [19], intra-uterine growth restriction (IUGR) and premature birth [20]. Epidemiological studies conducted in Ethiopia identified some risk factors for low birth weight. Education and occupational status [21], maternal stature and weight [22], hypertensive disorders during pregnancy [23], congenital malformations [24] and indoor pollution from the type of fuel used for cooking [21] were predictors of low birth weight.

In 2014, the World Health Organization (WHO) identified evidence-based interventions to prevent low birth weight [6]. Overview of systematic reviews showed the positive effect of multiple micronutrient supplements and preventive antimalarial drugs during pregnancy on low birth weight [5, 25]. Additionally, intake of Docosahexaenoic Acid (DHA) was associated with lower rates of low birth weight [26]. In Ethiopia, one prospective cohort reported lower risks of adverse pregnancy outcomes (including low birth weight) among consumers of dairy, fruits and dark green leafy vegetables [27].

Ethiopia has made a notable achievement in reducing neonatal mortality during the era of the Millennium Development Goals (MDGs) [28]. Goal 3 of the new Sustainable Development Goals (SDGs) targets broader health topics related to newborn and child health. Because SDGs

address a range of socio-economic and environmental risk factors for health-related problems [29], identifying risk factors for low birth weight has many benefits to set preventive and treatment strategies. The Ethiopian government aspires to decrease neonatal mortality to 10 per 1000 live births by 2035 [30]. The findings of this study will add evidence for intervention designers to establish appropriate management protocols, targeted to the study area. The study area is located in a region where neonatal mortality and stunting are high in the country [8]. Therefore, this study aimed to identify risk factors for low birth weight in hospitals of North Wello Zone, Ethiopia.

## Methods and materials

### Study design and setting

A hospital-based unmatched case-control study design was employed from April 10 to December 15, 2016, in North Wello zone hospitals. This zone has an estimated total population of 1,500,303 (752,895 men and 747,408 women). Based on reports from the zone's health sector office, North Wello zone has 3 hospitals and 64 functional health centers. The study was conducted in the three hospitals; Woldia General Hospital, Lalibela hospital, and Kobo hospital, which are located 520, 700 and 571 kilometers away from Addis Ababa respectively. In 2015, there were 6,013 births in Woldia, Lalibela and Kobo towns.

### Study population

Newborns who were born in the three public hospitals during the study period (8 months) were the source population of this study. Mothers of the newborns were the source of the information. Live newborns delivered at term without known risk factors (i.e. intrauterine growth restriction) of low birth weight were included in the study. Mothers who gave birth before 37 completed weeks of gestation and mothers with medical conditions, which affect birth weight (i.e. hypertensive disorders of pregnancy, diabetes mellitus), were excluded from the study. Mothers who gave birth to neonates weighing less than 2500 grams were cases and neonates  $\geq 2500$  grams were controls.

### Study variables

The outcome/dependent variable was low birth weight. The exposure/independent variables were socio-demographic variables (maternal age, education, occupation,), obstetric factors (gravidity, parity, ANC visit, place of delivery, place of prenatal visit, information about danger signs, complications during last birth, maternal weight and height and gestational age at first booking) and environmental characteristics (water treatment, site of defecation, Khat chewing, source and storage of drinking water, handwashing, presence of windows, separate room for kitchen and family water consumption).

### Sample size determination

The sample size was determined using the proportion difference approach with the following assumptions: 95% confidence level ( $Z\alpha/2 = 1.96$ ), power ( $Z\beta = 0.84$ ), control to case ratio 2:1 ( $r = 2$ ), odds ratio to be detected 2.1 and 20% [21] of control group to be exposed. Adding a 5% non-response rate, the final required sample size was 375 (125 cases and 250 controls).

### Sampling and data collection procedure

All the three hospitals in the zone were selected purposively. Babies of mothers who delivered during the study periods were measured using a calibrated scale within 15 minutes of delivery.

Cases (birth weight less than 2500 grams) were included in the study and two consecutive mothers in the controls (birth weight between 2500 grams and 4000 grams) were interviewed.

Data were collected using a pre-tested and structured questionnaire through a face-to-face interview. The tool was adapted from previously published work [21]. The questionnaire was composed of three sections: socio-demographic characteristics, maternal/obstetric characteristics, and environmental characteristics. First, it was prepared in English, translated to Amharic and back-translated by fluent speakers of both languages. A maternal health expert checked the validity of the tool and pilot study was conducted on 5% of the sample size in Alamata hospital. The Amharic version was used to collect the data. Six diploma-qualified midwives collected the data (one day and one night at each hospital). Three Bachelor of Science (BSc) qualified midwives supervised data collection and checked the completeness of the questionnaire. The principal investigator trained the supervisors and data collectors about the tool and procedure of data collection. Supervisors checked the completeness of the data.

### Operational/term definitions

**Low birth weight (LBW):** In this study, a newborn was considered as low birth weight if they weighed less than 2500 grams.

**Normal birth weight (NBW):** birth weight between 2500 and 4000 grams.

**Preterm birth:** delivery before 37 completed weeks of gestation.

### Statistical analysis

After checking for completeness, the data were coded and entered into a statistical package for social sciences (SPSS) version 20.0-computer software for analysis. Frequency distributions including cross tabulation between cases and controls were completed. Univariable and multivariable logistic regression analyses were computed to see the effect of independent variables on the outcome variable.

In the univariable logistic regression analysis, the variables entered were husband education, income, maternal occupation and education, place of ANC visit, maternal age, height, weight, information about obstetric danger signs, gravidity, history of obstetric complications, gestational age at first antenatal care visit, source of drinking water, water treatment before drinking presence of windows, separate room for kitchen, khat chewing, site of storage for water, family water consumption, hand washing, solid waste disposal and latrine type.

Variables with p-value  $\leq 0.2$  in the univariable analysis (husband's education, place of ANC visit, informed about danger signs during ANC visit, history of obstetric complications, maternal weight, height, age, gravidity, gestational age at first antenatal booking, khat chewing, source of drinking water, site for storage of water, water treatment, hand washing, separate room for cooking, family water consumption and presence of windows) were entered to multivariable logistic regression analysis. Backward stepwise logistic regression method was used. Hosmer and Lemeshow goodness-of-fit was used to test model fitness. Statistically significant variables were declared at p-value less than 0.05. Odds ratio (OR) with 95% confidence interval was used to describe the strength of association between the independent variables and outcome variable. A brief sensitivity analysis was done for the model (S1 Table).

### Ethical approval and consent to participate

The institutional review board (IRB) of Woldia University approved this study. A letter of permission was secured from North Wello zone health sector. Informed verbal consent was obtained from study participants after explaining the objectives of the study. The tool had attached consent form. Assent was received from participants less than 18 years old and

permission was obtained from primary guardians available during data collection. As most of our study participants unable to read and write, the data collectors document consent by circling 'yes' or 'No' options provided at the end of the form. Confidentiality was ensured by anonymizing the respondents' name.

## Results

### Socio-demographic characteristics of the respondents

A total of 360 cases and controls were included in the study, yielding a response rate of 96%. The mean age ( $\pm$ SD) of the respondents was 27.7 ( $\pm$ 5.6) which ranged from 15 to 45 years. About three-quarter of the cases and 83% of the controls were between the age group of 21 to 35. Most of the respondents practiced Ethiopian Orthodox Christianity (more than three-fourths from cases and 70.8% from controls). Majority of the respondents had no formal education and were housewives [Table 1].

### Obstetric characteristics

The mean gestational age ( $\pm$ SD) and birth weight ( $\pm$ SD) were 39.2 ( $\pm$ 1.38) weeks and 2800 ( $\pm$ 612) grams respectively. The mean age of respondents during their first and last birth was 22.2 and 26.1 years, respectively. More than one-third of mothers in the cases and 40.8% of the controls had their first birth before the age of 20. Approximately 23% of mothers in the cases weighed below 50 kilograms during their pregnancy. Approximately one-third of mothers in the cases encountered obstetric complications during pregnancy. Vaginal bleeding was the most frequently mentioned danger sign by 34.8% of cases and 59.7% of controls [Table 2].

### Environmental characteristics and lifestyle of participants

The average daily water consumption per liter per household of cases was 89.2% and the majority (60%) of the cases did not treat water before drinking. Nearly one-fourth of the cases and one-fifth of the controls had no latrine. Most of the respondents (75.8% cases and 54.2% controls) used firewood for cooking. Approximately one-third of women in the case group drink alcohol and 11% chewed Khat [Table 3].

### Risk factors for low birth weight

Husband's education was found to be significantly associated with low birth weight. Illiterate mothers were 4 times more likely to have low birth weight (AOR: 4.09; 95% CI 1.45, 11.50). Mothers who attended their ANC visit at private health facilities were 87% less likely to have low birth weight infant (AOR: 0.13; 95% CI 0.02, 0.66). Additionally, mothers who did experience any obstetric complications during their last pregnancy had a higher chance of having low birth weight infant (AOR: 5.70; 95% CI 2.38, 13.63).

Maternal weight during pregnancy was another variable that was significantly associated with low birth weight. Mothers who weighed less than 50 kilograms were 4 times (AOR: 4.04; 95% CI 1.50, 10.84) more likely to have low birth weight baby than mothers who weighed more than 50 kilograms. Gravidity (2–4 pregnancies) also showed significant association with low birth weight (AOR: 0.36; 95% CI 0.18, 0.73). From the environmental factors, the site of storage for water and water treatment were statistically significant variables for low birth weight [Table 4].

**Table 1. Socio-demographic characteristics of mothers in North Wello zone Hospitals, Ethiopia, December 2016.**

| Variables                                   | Low birth weight |      | Normal birth weight |      |
|---------------------------------------------|------------------|------|---------------------|------|
|                                             | N                | %    | N                   | %    |
| Mothers age (n = 360)                       |                  |      |                     |      |
| ≤ 20                                        | 19               | 15.8 | 15                  | 6.2  |
| 21–35                                       | 89               | 74.2 | 200                 | 83.3 |
| >35                                         | 12               | 10.0 | 25                  | 10.4 |
| Marital status (n = 360)                    |                  |      |                     |      |
| Married                                     | 97               | 80.8 | 208                 | 86.7 |
| Divorced                                    | 12               | 10.0 | 9                   | 3.8  |
| Separated                                   | 2                | 1.7  | 6                   | 2.5  |
| Single                                      | 8                | 6.7  | 12                  | 5    |
| Widowed                                     | 1                | 0.8  | 5                   | 2.1  |
| Religion (n = 360)                          |                  |      |                     |      |
| Ethiopian Orthodox Christianity             | 92               | 76.7 | 170                 | 70.8 |
| Protestant                                  | 5                | 4.2  | 19                  | 7.9  |
| Muslim                                      | 23               | 19.2 | 51                  | 21.2 |
| Residence                                   |                  |      |                     |      |
| Urban                                       | 70               | 58.3 | 147                 | 61.2 |
| Rural                                       | 50               | 41.7 | 93                  | 38.8 |
| Ethnicity (n = 360)                         |                  |      |                     |      |
| Amhara                                      | 107              | 89.2 | 197                 | 82.1 |
| Tigre                                       | 13               | 10.8 | 43                  | 17.9 |
| Maternal formal education (n = 360)         |                  |      |                     |      |
| Yes                                         | 87               | 72.5 | 164                 | 68.3 |
| No                                          | 33               | 27.5 | 76                  | 31.7 |
| Education status of the mother (n = 251)    |                  |      |                     |      |
| Primary                                     | 19               | 21.8 | 46                  | 28.0 |
| Secondary                                   | 34               | 39.1 | 55                  | 33.5 |
| More than secondary                         | 34               | 39.1 | 63                  | 38.4 |
| Educational status of the husband (n = 305) |                  |      |                     |      |
| Illiterate                                  | 18               | 18.6 | 24                  | 11.5 |
| Read and write only                         | 31               | 32   | 53                  | 25.5 |
| Primary                                     | 12               | 12.4 | 40                  | 19.2 |
| Secondary and above                         | 36               | 37.1 | 91                  | 43.8 |
| Maternal occupation (n = 360)               |                  |      |                     |      |
| Housewife                                   | 49               | 40.8 | 109                 | 45.4 |
| Farmer                                      | 26               | 21.7 | 26                  | 10.8 |
| Private employee                            | 4                | 3.3  | 19                  | 7.9  |
| Merchant                                    | 13               | 10.8 | 43                  | 17.9 |
| Daily laborer                               | 10               | 8.3  | 13                  | 5.4  |
| Gov't employee                              | 18               | 15.0 | 26                  | 10.8 |
| Others*                                     |                  |      | 4                   | 1.7  |
| Husband occupation (n = 305)                |                  |      |                     |      |
| Farmer                                      | 39               | 40.6 | 65                  | 31.1 |
| Merchant                                    | 18               | 18.8 | 56                  | 26.8 |
| Private employee                            | 7                | 7.3  | 29                  | 13.9 |
| Daily laborer                               | 3                | 3.1  | 5                   | 2.4  |
| Gov't employee                              | 29               | 30.2 | 54                  | 25.8 |

(Continued)

Table 1. (Continued)

| Variables                                    | Low birth weight |      | Normal birth weight |      |
|----------------------------------------------|------------------|------|---------------------|------|
|                                              | N                | %    | N                   | %    |
| Monthly income of the family (ETB) (n = 360) |                  |      |                     |      |
| < 500                                        | 55               | 45.8 | 107                 | 44.6 |
| 500–1500                                     | 22               | 18.3 | 36                  | 15.0 |
| > 1500                                       | 43               | 35.8 | 97                  | 40.4 |

\*student; ETB Ethiopian Birr

<https://doi.org/10.1371/journal.pone.0213054.t001>

## Discussion

Low birth weight is one of the leading causes of neonatal mortality and is influenced by various socio-economic, maternal and environmental factors [31]. This study identified some socio-economic, obstetric and environmental risk factors for low birth weight in the study area.

This study revealed that husband's education was associated with low birth weight. A finding from the Ethiopian Demographic and Health Survey (EDHS) showed that husband's educational status was significantly associated with low birth weight [32]. The 2016 EDHS also reported that births to mothers without education were more likely to be low birth weight [8]. Similarly, maternal illiteracy was associated with low birth weight in one Iranian study [33]. This might be due to the fact that families with formal education could have better nutrition and access to health facilities during pregnancy. Additionally, rural residence increased the odds of low birth weight in a study done in northern Ethiopia and Iran [10, 33]. This suggests that health messages should be tailored based on education level. However, it should be noted that the odds of this variable in this study represent only married women.

Epidemiologic studies in Ethiopia showed that lack of antenatal care was significantly associated with low birth weight [21, 34]. In this study, the place of antenatal care (ANC) follow-up was another significant variable associated with low birth weight. Mothers who attended ANC follow-ups at private health institutions were less likely to have low birth weight babies. A study conducted among women attending private hospitals in Pakistan showed that socio-economic factors (education, income) were not associated with low birth weight [35]. Additionally, women in higher wealth quantile with some education had lower odds of low birth weight babies [36]. This could be due to the indirect effect of income, which favors better access to nutrition and other basic needs during pregnancy. Additionally, appropriate service care provided by the private sector could explain this [37]. Furthermore, this may suggest the need of universal standard prenatal interventions. This finding may be also alarm for health sector officials to improve the quality of prenatal services in government health institutions.

This study revealed that maternal weight was a predictor of low birth weight. Mothers who weighed less than 50 kilograms during their pregnancy were at higher risk of delivering a baby with low birth weight than mothers weighed more than 50 kilograms. This finding was consistent with studies conducted in Ethiopia and other countries [21, 34, 38, 39]. A review article also demonstrated that optimal weight gain during pregnancy was associated with desired birth weight [40]. Furthermore, maternal BMI was significantly associated with birth weight in Senegal [7]. This indicates the need for promotion of ANC follow-up and nutritional counseling during pregnancy. Adapting and implementing nutritional projects of other countries may be important to prevent low birth weight.

Additionally, number of pregnancies was an obstetric factor associated with low birth weight in the present study. Mothers who were in their second to fourth pregnancy were less likely to

**Table 2. Maternal/Obstetric characteristics of respondents in North Wello zone Hospitals, Ethiopia, December 2016.**

| Variables                                                              | Low birth weight |      | Normal birth weight |      |
|------------------------------------------------------------------------|------------------|------|---------------------|------|
|                                                                        | N                | %    | N                   | %    |
| Maternal age at first birth (n = 360)                                  |                  |      |                     |      |
| ≤ 20                                                                   | 46               | 38.3 | 98                  | 40.8 |
| > 20                                                                   | 74               | 61.7 | 142                 | 59.2 |
| Maternal age at last birth (n = 360)                                   |                  |      |                     |      |
| < 35                                                                   | 115              | 95.8 | 225                 | 93.8 |
| ≥ 35                                                                   | 5                | 4.2  | 15                  | 6.2  |
| Maternal weight in kilograms (n = 360)                                 |                  |      |                     |      |
| < 50                                                                   | 28               | 23.3 | 20                  | 8.3  |
| ≥ 50                                                                   | 92               | 76.7 | 220                 | 91.7 |
| Maternal height in meters (360)                                        |                  |      |                     |      |
| ≤ 1.50                                                                 | 17               | 14.2 | 16                  | 6.7  |
| > 1.50                                                                 | 103              | 85.8 | 224                 | 93.3 |
| Maternal BMI (Kg/m <sup>2</sup> ) (n = 360)                            |                  |      |                     |      |
| <18.5                                                                  | 8                | 6.7  | 4                   | 1.7  |
| 18.5–25.0                                                              | 95               | 79.2 | 181                 | 75.4 |
| >25.0                                                                  | 17               | 14.2 | 55                  | 22.9 |
| ANC follow up (n = 360)*                                               |                  |      |                     |      |
| Yes                                                                    | 107              | 89.2 | 210                 | 87.5 |
| No                                                                     | 13               | 10.8 | 30                  | 12.5 |
| Number of ANC visits (n = 317)                                         |                  |      |                     |      |
| 1                                                                      | 6                | 5.5  | 5                   | 2.4  |
| 2–4                                                                    | 99               | 90.8 | 191                 | 91.8 |
| >4                                                                     | 4                | 3.7  | 12                  | 5.8  |
| Place of ANC visit (n = 317)                                           |                  |      |                     |      |
| Public health facility                                                 | 106              | 97.2 | 175                 | 84.1 |
| Private health facility                                                | 3                | 2.8  | 33                  | 15.9 |
| Number of pregnancies (n = 360)                                        |                  |      |                     |      |
| 1                                                                      | 54               | 45.0 | 67                  | 27.9 |
| 2–4                                                                    | 53               | 44.2 | 150                 | 62.5 |
| > 4                                                                    | 13               | 10.8 | 23                  | 9.6  |
| Gestational age (weeks) at first ANC visit (n = 309)                   |                  |      |                     |      |
| ≤ 16                                                                   | 32               | 30.5 | 88                  | 43.1 |
| 17–24                                                                  | 52               | 49.5 | 84                  | 41.2 |
| > 24                                                                   | 21               | 20.0 | 32                  | 15.7 |
| Having a history of obstetric complications during pregnancy (n = 360) |                  |      |                     |      |
| Yes                                                                    | 35               | 29.2 | 29                  | 12.1 |
| No                                                                     | 85               | 70.8 | 211                 | 87.9 |
| Having a history of abortion (n = 360)                                 |                  |      |                     |      |
| Yes                                                                    | 23               | 19.2 | 41                  | 17.1 |
| No                                                                     | 97               | 80.8 | 199                 | 82.9 |
| danger signs informed for the mothers (n = 360)**                      |                  |      |                     |      |
| Vaginal bleeding                                                       | 88               | 34.8 | 151                 | 59.7 |
| Vaginal gush of fluid                                                  | 60               | 23.7 | 104                 | 41.1 |
| Severe headache                                                        | 81               | 32.0 | 132                 | 52.2 |

(Continued)



Table 2. (Continued)

| Variables                                          | Low birth weight |      | Normal birth weight |      |
|----------------------------------------------------|------------------|------|---------------------|------|
|                                                    | N                | %    | N                   | %    |
| Blurred vision                                     | 70               | 27.7 | 94                  | 37.2 |
| Fever                                              | 59               | 23.3 | 96                  | 37.9 |
| Abdominal pain                                     | 64               | 25.3 | 77                  | 30.4 |
| danger signs encountered by the mothers (n = 71)** | 8                |      |                     |      |
| Vaginal bleeding                                   | 7                | 12.9 | 7                   | 11.3 |
| Vaginal gush of fluid                              | 11               | 11.3 | 12                  | 19.4 |
| Severe headache                                    | 7                | 17.7 | 6                   | 9.7  |
| Blurred vision                                     | 2                | 11.3 | 1                   | 1.6  |
| Fever                                              | 8                | 3.2  | 0                   | 0    |
| Abdominal pain                                     |                  | 12.9 | 2                   | 3.2  |

\*at least one visit

\*\*variables with multiple responses

<https://doi.org/10.1371/journal.pone.0213054.t002>

have low birth weight infant than primigravidas. Parity was significantly associated with birth weight in northwest Ethiopia and the Gambia and London [17, 22] [33]. Another hospital based study in London [38] showed association of parity with low birth weight. A cross-sectional study conducted in Central Africa revealed that adolescent women had significant risks of delivering a low birth weight baby [41]. This might be due to the effect of placental factors as gravidity/parity increases. A systematic review and meta-analysis revealed an association between nulliparity with low birth weight [42]. This shows the need of universal and quality prenatal care, nutritional counseling to all pregnant women. Additionally, early marriage and teenage pregnancy should be discouraged to prevent low birth weight in this group of women.

This study identified history of obstetric complications as a risk factor for low birth weight. Study subjects who did not experience any obstetric complications during their past pregnancies had decreased risk of low birth weight babies. Similar findings were reported by other descriptive studies in Ethiopia [21, 23, 32]. This may be an indication for the importance of early detection and treatment of complications during ANC visits. Moreover, socio-economic characteristics of women should be taken in to account. This finding may also an indication to launch the current WHO recommendations on frequency of ANC visits.

The present finding showed the protective effect of storing water in an open container and drinking without treatment for low birth weight. Studies showed that prenatal exposure to chlorination by-products in drinking water was associated with risks of small for gestational age [43, 44]. A cohort study in India reported that low birth weight was not associated with type and time to a drinking water source [45]. On the other hand, arsenic exposure in drinking water was associated with increased odds of low birth weight [46, 47]. However, the findings of the present study may be due to the uncontrolled effect of other variables and small sample size. Improvement of clean and adequate water, sanitation and hygiene were identified as evidence-based interventions to prevent low birth weight [6]. Additionally, further study is required to better elucidate the relationship of low birth weight with these variables. As most deliveries in Ethiopia occurred at home [8], these counterintuitive results might be due to differences in the analytical sample and the general population.

As strength, the authors excluded known risk factors of low birth weight to minimize possible confounding. Additionally, the authors selected institution-based cases to minimize

**Table 3. Environmental and lifestyle characteristics of respondents in North Wello Zone Hospitals, Ethiopia, December 2016.**

| Variables                                           | Low birth weight |      | Normal birth weight |      |
|-----------------------------------------------------|------------------|------|---------------------|------|
|                                                     | N                | %    | N                   | %    |
| Source of drinking water (n = 360)                  |                  |      |                     |      |
| Protected                                           | 91               | 75.8 | 203                 | 84.6 |
| Not protected                                       | 29               | 24.2 | 37                  | 15.4 |
| Household water consumption per liter/day (n = 360) |                  |      |                     |      |
| < 50                                                | 107              | 89.2 | 187                 | 77.9 |
| ≥ 50                                                | 13               | 10.8 | 53                  | 22.1 |
| Average time required to fetch water (n = 360)      |                  |      |                     |      |
| < 30 minutes                                        | 112              | 93.3 | 213                 | 88.8 |
| ≥ 30 minutes                                        | 8                | 6.7  | 27                  | 11.2 |
| Presence of latrine (n = 360)                       |                  |      |                     |      |
| Yes                                                 | 91               | 75.8 | 194                 | 80.8 |
| No                                                  | 29               | 24.2 | 46                  | 19.2 |
| Having a separate room for kitchen (n = 360)        |                  |      |                     |      |
| Yes                                                 | 72               | 60.0 | 174                 | 72.5 |
| No                                                  | 48               | 40.0 | 66                  | 27.5 |
| Type of fuel mainly used for cooking (n = 360)      |                  |      |                     |      |
| Wood                                                | 91               | 75.8 | 130                 | 54.2 |
| Kerosene                                            | 3                | 2.5  | 9                   | 3.2  |
| Electricity                                         | 18               | 15.0 | 85                  | 35.4 |
| Animal Dung                                         | 8                | 6.7  | 16                  | 6.7  |
| Treating drinking water (n = 360)                   |                  |      |                     |      |
| Yes                                                 | 48               | 40.0 | 59                  | 24.6 |
| No                                                  | 72               | 60.0 | 181                 | 75.4 |
| Time of hand washing*                               |                  |      |                     |      |
| After visiting latrine                              | 92               | 25.6 | 170                 | 47.4 |
| Before preparing food                               | 102              | 28.4 | 155                 | 43.2 |
| Before serving food                                 | 97               | 27.0 | 142                 | 39.6 |
| After eating                                        | 95               | 26.5 | 192                 | 53.5 |
| After cleaning child feces                          | 80               | 22.3 | 169                 | 47.1 |
| Drinking alcohol during pregnancy (n = 360)         |                  |      |                     |      |
| Yes                                                 | 38               | 31.7 | 76                  | 31.7 |
| No                                                  | 82               | 68.3 | 164                 | 68.3 |
| Type of alcohol consumed by the mothers (n = 165)*  |                  |      |                     |      |
| Tela <sup>†</sup>                                   | 35               | 30.4 | 58                  | 50.4 |
| Tej <sup>†</sup>                                    | 16               | 13.9 | 14                  | 12.2 |
| Areke <sup>†</sup>                                  | 2                | 1.7  | 3                   | 2.6  |
| Beer/draft                                          | 7                | 6.1  | 28                  | 24.3 |
| Wine                                                | 2                | 1.7  | 0                   | 0    |
| Khat chewing (n = 360)                              |                  |      |                     |      |
| Yes                                                 | 13               | 10.8 | 14                  | 5.8  |
| No                                                  | 107              | 89.2 | 226                 | 94.2 |

\*variables with multiple responses

<sup>†</sup>traditional homemade alcohols in Ethiopia

<https://doi.org/10.1371/journal.pone.0213054.t003>

**Table 4. Association of socio-demographic, obstetric and environmental risk factors with low birth weight in North Wello Zone Hospitals, Ethiopia, December 2016.**

| Variables                                | Birth weight N (%) |            | COR (95% CI)        | AOR (95% CI)                |
|------------------------------------------|--------------------|------------|---------------------|-----------------------------|
|                                          | LBW                | NBW        |                     |                             |
| Husband education                        |                    |            |                     |                             |
| Illiterate                               | 19 (19.4)          | 24 (11.5)  | 2.00 (0.98, 4.09)   | 4.09 (1.45, 11.50)*         |
| Read and write only                      | 31 (31.6)          | 53 (25.5)  | 1.48 (0.82, 2.66)   | 1.85 (0.81, 4.19)           |
| Primary school                           | 12 (12.2)          | 40 (19.2)  | 0.76 (0.34, 1.60)   | 0.83 (0.32, 2.18)           |
| Secondary and above                      | 36 (36.7)          | 91 (43.8)  | 1                   | 1                           |
| Place of ANC visit                       |                    |            |                     |                             |
| Public HI                                | 106 (97.2)         | 175 (84.1) | 1                   | 1                           |
| Private HI                               | 3 (2.8)            | 33 (15.9)  | 6.66 (1.99, 22.26)  | <b>0.13 (0.02, 0.66)*</b>   |
| Informed about danger signs of pregnancy |                    |            |                     |                             |
| Yes                                      | 91 (82.0)          | 162 (75.7) | 1                   | 1                           |
| No                                       | 20 (18.0)          | 52 (24.3)  | 0.68 (0.38, 1.22)   | 0.82 (0.31, 2.14)           |
| Complications during last birth          |                    |            |                     |                             |
| Yes                                      | 35 (29.2)          | 29 (12.1)  | 2.99 (1.72, 5.20)   | <b>5.70 (2.38, 13.63)**</b> |
| No                                       | 85 (70.8)          | 211 (87.9) | 1                   | 1                           |
| Maternal weight                          |                    |            |                     |                             |
| <50 kg                                   | 28 (23.3)          | 20 (8.3)   | 3.35 (1.79, 6.24)   | <b>4.04 (1.50, 10.84)*</b>  |
| ≥50 kg                                   | 92 (76.7)          | 211 (91.7) | 1                   | 1                           |
| Maternal height                          |                    |            |                     |                             |
| ≤1.5 meters                              | 17 (14.2)          | 16 (6.7)   | 2.31 (1.12, 4.75)   | 0.46 (0.14, 1.50)           |
| >1.5 meters                              | 103 (85.8)         | 224 (93.3) | 1                   | 1                           |
| Maternal age                             |                    |            |                     |                             |
| ≤20                                      | 19 (15.8)          | 15 (6.2)   | 2.64 (1.005, 6.93)  | 1.46 (0.14, 14.60)          |
| 21–35                                    | 89 (74.2)          | 200 (83.3) | 0.927 (0.446, 1.92) | 2.48 (0.26, 23.64)          |
| >35                                      | 12 (10.0)          | 25 (10.4)  | 1                   | 1                           |
| Gravidity                                |                    |            |                     |                             |
| 1                                        | 54 (45.0)          | 67 (27.9)  | 1                   | 1                           |
| 2–4                                      | 53 (44.2)          | 150 (62.5) | 0.44 (0.27, 0.70)   | <b>0.36 (0.18, 0.73)*</b>   |
| >4                                       | 13 (10.8)          | 23 (9.6)   | 0.70 (0.32, 1.51)   | 0.44 (0.15, 1.31)           |
| Gestational age at first ANC visit       |                    |            |                     |                             |
| ≤16                                      | 32 (30.5)          | 88 (43.1)  | 1                   | 1                           |
| 17–24                                    | 52 (49.5)          | 84 (41.2)  | 1.70 (1.00, 2.89)   | 1.16 (0.53, 2.52)           |
| >24                                      | 21 (20.0)          | 32 (15.7)  | 1.80 (0.91, 3.57)   | 2.10 (0.77, 5.70)           |
| Khat chewing                             |                    |            |                     |                             |
| Yes                                      | 13 (10.8)          | 14 (5.2)   | 1.96 (0.89, 4.32)   | 1.42 (0.34, 5.61)           |
| No                                       | 107 (89.2)         | 226 (94.2) | 1                   | 1                           |
| Source of drinking water                 |                    |            |                     |                             |
| Protected                                | 91 (75.8)          | 203 (84.6) | 1                   | 1                           |
| Not protected                            | 29 (24.2)          | 37 (15.4)  | 1.42 (0.78, 2.55)   | 0.56 (0.18, 1.72)           |
| Site of storage for drinking water       |                    |            |                     |                             |
| Closed container                         | 87 (72.5)          | 148 (61.7) | 1                   | 1                           |
| Open container                           | 33 (27.5)          | 92 (38.3)  | 0.61 (0.38, 0.98)   | <b>0.25 (0.12, 0.50)**</b>  |

(Continued)

Table 4. (Continued)

| Variables                      | Birth weight N (%) |            | COR (95% CI)      | AOR (95% CI)               |
|--------------------------------|--------------------|------------|-------------------|----------------------------|
|                                | LBW                | NBW        |                   |                            |
| Water treatment                |                    |            |                   |                            |
| Yes                            | 48 (40.0)          | 59 (24.6)  | 1                 | 1                          |
| No                             | 72 (60.0)          | 181 (75.4) | 0.48 (0.30, 0.78) | <b>0.27 (0.13, 0.56)**</b> |
| Hand washing                   |                    |            |                   |                            |
| Water only                     | 26 (21.7)          | 67 (27.9)  | 0.72 (0.43, 1.12) | 0.53 (0.21, 1.34)          |
| Soap and water                 | 94 (78.3)          | 173 (72.1) | 1                 | 1                          |
| Presence of windows            |                    |            |                   |                            |
| Yes                            | 93 (77.5)          | 212 (88.3) | 1                 | 1                          |
| No                             | 27 (22.5)          | 28 (11.7)  | 2.12 (1.23, 3.93) | 1.20 (0.34, 4.28)          |
| Separate room for kitchen      |                    |            |                   |                            |
| Yes                            | 72 (60.0)          | 174 (72.5) | 1                 | 1                          |
| No                             | 48 (40.0)          | 66 (27.5)  | 1.76 (1.10, 2.79) | 1.74 (0.67, 4.54)          |
| Family water consumption/L/day |                    |            |                   |                            |
| <50                            | 107 (89.2)         | 187 (77.9) | 2.38 (1.24, 4.57) | 1.23 (0.47, 3.24)          |
| ≥50                            | 13 (10.8)          | 53 (22.1)  | 1                 | 1                          |

COR crude odds ratio; AOR adjusted odds ratio; CI confidence interval; HI health institution

\*statistically significant at p-value<0.05

\*\*p-value less than 0.001; Hosmer and Lemeshow test 0.23

<https://doi.org/10.1371/journal.pone.0213054.t004>

selection bias. However, this study may be prone to recall bias because the respondents were asked about their previous obstetric characteristics. Moreover, some confounders may not be controlled due to unmatched selection of study subjects. Generalizability of the results to the general population should be made cautiously, as observation was not made for house and environmental factors.

### Conclusion

This study showed that socio-demographic, maternal/obstetric and environmental characteristics were risk factors for low birth weight in the study areas. Husband educational status, place of ANC visits, previous obstetric complications, maternal weight during pregnancy and gravidity were significantly associated with low birth weight. Nutritional counseling during ANC visits for pregnant mothers and health information about obstetric complications should be advocated. Health professionals should be vigilant in early detection and management of complications during pregnancy. Additionally, efforts should be done to improve living standard and lifestyles of mothers. Community based studies are needed to better address household and environmental factors with observation.

### Supporting information

**S1 Table.**  
(DOCX)

**S1 File.**  
(SAV)

## Acknowledgments

Authors are thankful for Woldia University for financing this study. We also thank the staffs of North Wello zone health sector, managers and medical directors of the hospitals for giving the necessary information needed to conduct this study. Authors are also grateful for data collectors, supervisors and study subjects.

## Author Contributions

**Conceptualization:** Tesfahun Mulatu Wachamo.

**Data curation:** Asmamaw Demis Bizuneh.

**Formal analysis:** Nigus Bililign Yimer.

**Methodology:** Nigus Bililign Yimer.

**Project administration:** Tesfahun Mulatu Wachamo.

**Supervision:** Asmamaw Demis Bizuneh.

**Writing – original draft:** Tesfahun Mulatu Wachamo.

**Writing – review & editing:** Nigus Bililign Yimer, Asmamaw Demis Bizuneh.

## References

1. Glass HC, Costarino AT, Stayer SA, Brett CM, Cladis F, Davis PJ: Outcomes for extremely premature infants. *Anesthesia and analgesia* 2015, 120(6):1337–1351. <https://doi.org/10.1213/ANE.0000000000000705> PMID: 25988638
2. UNICEF, WHO, Bank W, Division U-DP: Levels and trends in child mortality report 2017: Estimates Developed by the UN Inter-agency Group for Child Mortality Estimation. In. 3 UN Plaza, New York, New York, 10017 USA: UNICEF; 2017.
3. Grady SC, Frake AN, Zhang Q, Bene M, Jordan DR, Vertalka J, Dossantos TC, Kadhim A, Namanya J, Pierre L-M: Neonatal mortality in East Africa and West Africa: a geographic analysis of district-level demographic and health survey data. *Geospatial health* 2017, 12(1).
4. Hug L, Sharrow D, You D: Levels & trends in child mortality: report 2017. Estimates developed by the UN Inter-agency Group for Child Mortality Estimation. 2017.
5. da Silva Lopes K, Ota E, Shakya P, Dagvadorj A, Balogun OO, Peña-Rosas JP, De-Regil LM, Mori R: Effects of nutrition interventions during pregnancy on low birth weight: an overview of systematic reviews. *BMJ global health* 2017, 2(3):e000389. <https://doi.org/10.1136/bmjgh-2017-000389> PMID: 29018583
6. Organization WH: Global Nutrition Targets 2025: Low birth weight policy brief. 2014.
7. He Z, Bishwajit G, Yaya S, Cheng Z, Zou D, Zhou Y: Prevalence of low birth weight and its association with maternal body weight status in selected countries in Africa: a cross-sectional study. *BMJ open* 2018, 8(8):e020410. <https://doi.org/10.1136/bmjopen-2017-020410> PMID: 30158218
8. Agency CS, ICF TDP: Ethiopian Demographic and Health Survey 2016 In. Addis Ababa, Ethiopia, and Rockville, Maryland, USA: CSA and ICF; 2017.
9. Mulatu H, Zepre K, Betre M, Hailemichael G: Magnitude and Factors Associated With Low Birth Weight among New Born In Selected Public Hospitals of Addis Ababa, Ethiopia, 2016. *Global Journal of Medical Research* 2017.
10. Mengesha HG, Wuneh AD, Weldearegawi B, Selvakumar DL: Low birth weight and macrosomia in Tigray, Northern Ethiopia: who are the mothers at risk? *BMC pediatrics* 2017, 17(1):144. <https://doi.org/10.1186/s12887-017-0901-1> PMID: 28606178
11. Ballot Daynia E, Potterton Joanne, Chirwa Tobias, Hilburn N, Cooper PA: Developmental outcome of very low birth weight infants in a developing country. *BMC Pediatrics* 2012, 12(11).
12. Tchamo ME, Prista A, Leandro CG: Low birth weight, very low birth weight and extremely low birth weight in African children aged between 0 and 5 years old: a systematic review. *Journal of Developmental Origins of Health and Disease* 2016.

13. Chibwasha CJ, Zanolini A, Smid M, Vwalika B, Phiri Kasaro M, Mwanahamuntu M, Stringer JSA, Stringer EM: Predictors and outcomes of low birth weight in Lusaka, Zambia. *International Journal of Gynecology & Obstetrics* 2016, 134(3):309–314.
14. Lule S, Elliott A, Smeeth L, Webb E: Is birth weight associated with blood pressure among African children and adolescents? A systematic review. *Journal of developmental origins of health and disease* 2018:1–11.
15. Petry CJ, Ong KK, Beardsall K, Hughes IA, Acerini CL, Dunger DB: Vomiting in pregnancy is associated with a higher risk of low birth weight: a cohort study. *BMC Pregnancy and Childbirth* 2018, 18(1):133. <https://doi.org/10.1186/s12884-018-1786-1> PMID: 29728080
16. Mahumud RA, Sultana M, Sarker AR: Distribution and Determinants of Low Birth Weight in Developing Countries. *Journal of preventive medicine and public health = Yebang Uihakhoe chi* 2017, 50(1):18–28. <https://doi.org/10.3961/jpmph.16.087> PMID: 28173687
17. Jammeh A, Sundby J, Vangen S: Maternal and obstetric risk factors for low birth weight and preterm birth in rural Gambia: a hospital-based study of 1579 deliveries *OJOG* 2011, 1(3).
18. Mizanur Rahman Md Sarah Krull Abe, Shafiur Rahman Md, Mikiko Kanda, Narita Saki, Bilano V, et.al: Maternal anemia and risk of adverse birth and health outcomes in low- and middle-income countries: systematic review and meta-analysis. *The American journal of clinical nutrition* 2016, 103:495–504. <https://doi.org/10.3945/ajcn.115.107896> PMID: 26739036
19. Guyatt HL, Snow RW: Impact of Malaria during Pregnancy on Low Birth Weight in Sub-Saharan Africa. *CLINICAL MICROBIOLOGY REVIEWS* 2004:760–769. <https://doi.org/10.1128/CMR.17.4.760-769.2004> PMID: 15489346
20. Asia UROfS: Reduction of Low Birth Weight: A South Asia Priority. In. Kathmandu, Nepal: UNICEF; 2002.
21. Demelash H, Motbainor A, Nigatu D, Gashaw K, Melese A: Risk factors for low birth weight in Bale zone hospitals, South-East Ethiopia: a case–control study *BMC Pregnancy and Childbirth* 2015, 15(264).
22. Berihun Megabiaw Zeleke, Meseret Zelalem, Mohammed N: Incidence and correlates of low birth weight at a referral hospital in Northwest Ethiopia *Pan African Medical Journal* 2012.
23. Awoke Adane Akilew, Awoke Ayele Tadesse, Gedefaw Ararsa Leta, Bitew BD3, Zeleke aBM: Adverse birth outcomes among deliveries at Gondar University Hospital, Northwest Ethiopia. *BMC Pregnancy and Childbirth* 2014, 14(90).
24. Mekonen HK, Nigatu B, Lamers WH: Birth weight by gestational age and congenital malformations in Northern Ethiopia. *BMC Pregnancy and Childbirth* 2015, 15(76).
25. Rogne T, Tielemans MJ, Chong MF-F, Yajnik CS, Krishnaveni GV, Poston L, Jaddoe VW, Steegers EA, Joshi S, Chong Y-S: Associations of maternal vitamin B12 concentration in pregnancy with the risks of preterm birth and low birth weight: a systematic review and meta-analysis of individual participant data. *American journal of epidemiology* 2017, 185(3):212–223. <https://doi.org/10.1093/aje/kww212> PMID: 28108470
26. Carlson SE, Gajewski BJ, Alhayek S, Colombo J, Kerling EH, Gustafson KM: Dose-Response Relationship Between Docosahexaenoic Acid (DHA) Intake and Lower Rates of Early Preterm Birth, Low Birth Weight and Very Low Birth Weight. *Prostaglandins, Leukotrienes and Essential Fatty Acids* 2018.
27. Zerfu TA, Pinto E, Baye K: Consumption of dairy, fruits and dark green leafy vegetables is associated with lower risk of adverse pregnancy outcomes (APO): a prospective cohort study in rural Ethiopia. *Nutrition & diabetes* 2018, 8(1):52.
28. UNICEF: Levels & Trends in Child Mortality Report 2015: Estimates Developed by the UN Inter-agency Group for Child Mortality Estimation United. In. New York, USA: UNICEF, WHO, The World Bank, UNPD; 2015.
29. WHO: World health statistics 2016: monitoring health for the SDGs, sustainable development goals. In: Implications of the SDGs for health monitoring—a challenge and an opportunity for all countries. Geneva, Switzerland WHO; 2016.
30. FMOH: Health Sector Transformation Plan 2015/16–2019/20. In. Addis, Ababa, Ethiopia: FMOH; 2015.
31. UNICEF, WHO: United Nations Children’s Fund and World Health Organization, Low Birthweight: Country, regional and global estimates. UNICEF, New York In. Geneva, Switzerland UNICEF and WHO; 2004.
32. Alemu T, Umeta M: Prevalence and Determinants of Small Size Babies in Ethiopia: Results from in-depth Analyses of the Ethiopian Demographic and Health Survey—2011. *Fam Med Med Sci Res* 2015, 4(171).
33. Momeni M, Danaei M, Kermani AJN, Bakhshandeh M, Foroodnia S, Mahmoudabadi Z, Amirzadeh R, Safizadeh H: Prevalence and risk factors of low birth weight in the Southeast of Iran. *International journal of preventive medicine* 2017, 8.

34. SIZA JE: Risk factors associated with low birth weight of neonates among pregnant women attending a referral hospital in northern Tanzania. *Tanzania Journal of Health Research* 2008, 10(1).
35. Saeed A, Saeed AM: Maternal predictors of Low Birth Weight among women attending private hospitals of Lahore, Pakistan. *Progress in Nutrition* 2017, 19(3):257–263.
36. Muula A, Siziya S, Rudatsikira E: Parity and maternal education are associated with low birth weight in Malawi. *African health sciences* 2011, 11(1).
37. Benova L, Macleod D, Footman K, Cavallaro F, Lynch CA, Campbell OMR: Role of the private sector in childbirth care: cross-sectional survey evidence from 57 low- and middle-income countries using Demographic and Health Surveys. *Tropical Medicine and International Health* 2015, 20 (12):1657–1673. <https://doi.org/10.1111/tmi.12598> PMID: 26412496
38. Poon LCY, Volpe N, Muto B, Syngelaki A, Nicolaidis KH: Birthweight with Gestation and Maternal Characteristics in Live Births and Stillbirths. *Fetal Diagn Ther* 2012, 32:156–165. <https://doi.org/10.1159/000338655> PMID: 22846512
39. Tema T: PREVALENCE AND DETERMINANTS OF LOW BIRTH WEIGHT IN JIMMA ZONE, SOUTH-WEST ETHIOPIA. *East African Medical Journal* 2006, 83(7).
40. Muthayya S: Maternal nutrition & low birth weight—what is really important? *Indian J Med Res* 2009, 130:600–608. PMID: 20090114
41. Kurth F, Iard SB, GM-N, Schuster K, Adegnika AA, et al: Adolescence As Risk Factor for Adverse Pregnancy Outcome in Central Africa—A Cross-Sectional Study. *PLoS ONE* 2010, 5(12 e14367). <https://doi.org/10.1371/journal.pone.0014367> PMID: 21188301
42. Shah PS: Parity and low birth weight and preterm birth: a systematic review and meta-analyses. *Acta obstetrica et gynecologica Scandinavica* 2010, 89(7):862–875. <https://doi.org/10.3109/00016349.2010.486827> PMID: 20583931
43. Bonou SG, Levallois P, Giguere Y, Rodriguez M, Bureau A: Prenatal exposure to drinking-water chlorination by-products, cytochrome P450 gene polymorphisms and small-for-gestational-age neonates. *Reproductive toxicology (Elmsford, NY)* 2017, 73:75–86.
44. Levallois P, Gingras S, Marcoux S, Legay C, Catto C, Rodriguez M, Tardif R: Maternal exposure to drinking-water chlorination by-products and small-for-gestational-age neonates. *Epidemiology (Cambridge, Mass)* 2012, 23(2):267–276.
45. Baker KK, Story WT: Impact of social capital, harassment of women and girls, and water and sanitation access on premature birth and low infant birth weight in India. *PLoS One* 2018, 13(10):e0205345. <https://doi.org/10.1371/journal.pone.0205345> PMID: 30296283
46. AlMBERG KS, Turyk ME, Jones RM, Rankin K, Freels S, Graber JM, Stayner LT: Arsenic in drinking water and adverse birth outcomes in Ohio. *Environmental research* 2017, 157:52–59. <https://doi.org/10.1016/j.envres.2017.05.010> PMID: 28521257
47. Liu H, Lu S, Zhang B, Xia W, Liu W, Peng Y, Zhang H, Wu K, Xu S, Li Y: Maternal arsenic exposure and birth outcomes: A birth cohort study in Wuhan, China. *Environmental pollution (Barking, Essex: 1987)* 2018, 236:817–823.
